# Supplementary material
Source: PubMed Central journal article supplement (PMC3951668)

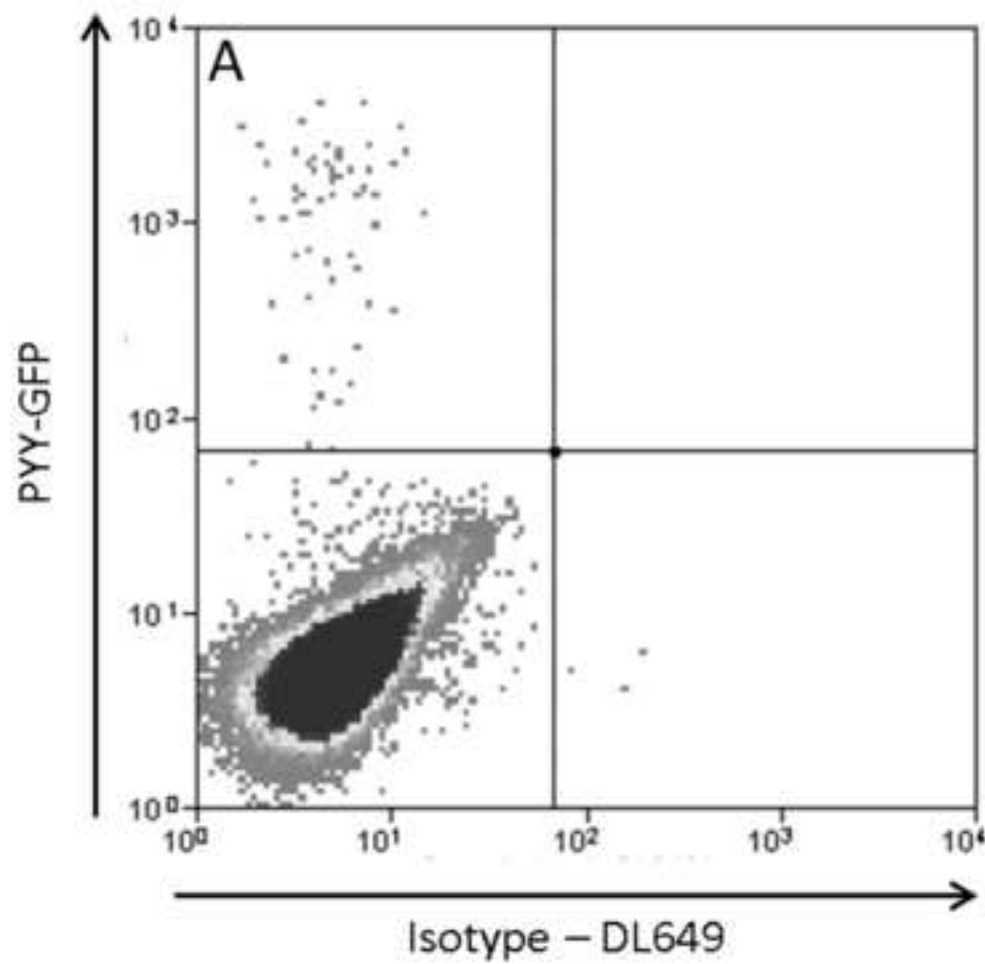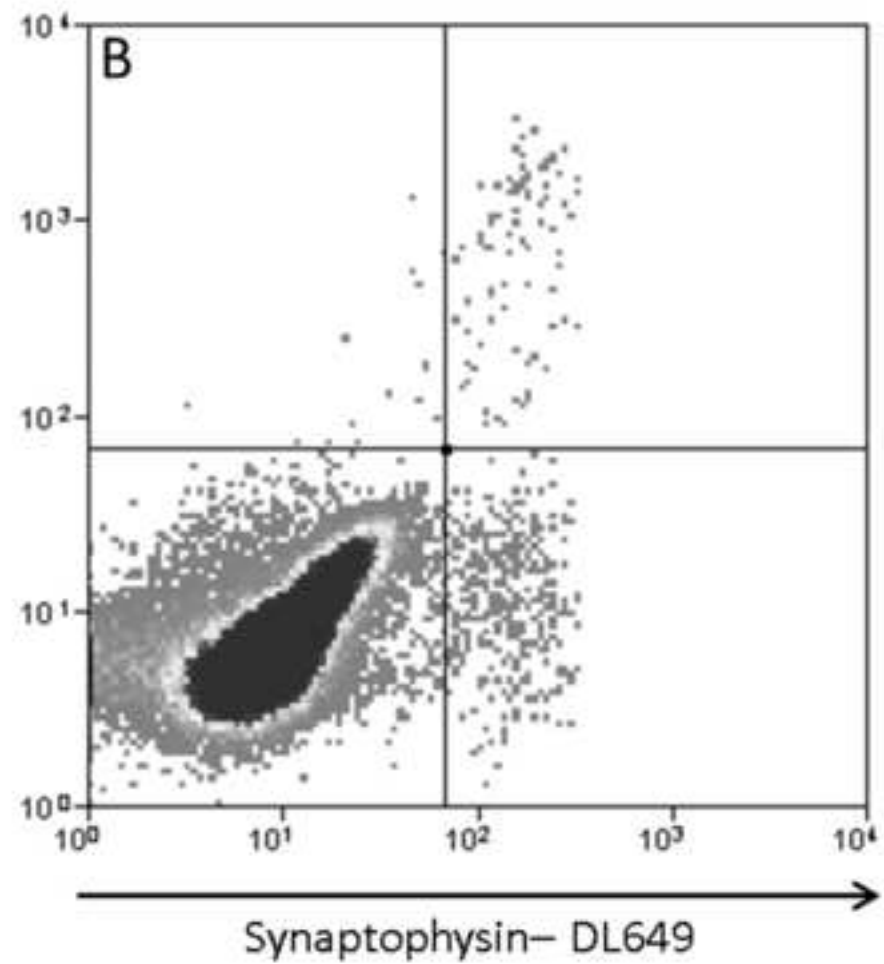

Supplement: NIHMS540714-supplement-01.pdf [file NIHMS540714-supplement-01.pdf]
